# Supplementary material for: A sandwich-type aluminium complex composed of tri-lacunary Keggin-type polyoxotungstate: synthesis and X-ray crystal structure of [(A-PW9O34)2{W(OH)(OH2)}{Al(OH)(OH2)}{Al(μ-OH)(OH2)2}2]7−
Source: Royal Society of Chemistry journal article supplement (doi:10.1039/c0dt00722f), 2010-01-01
Supplement: c0dt00722f.pdf [file c0dt00722f.pdf]

*Supporting information*

**Sandwich-type aluminum complex composed of tri-lacunary**

**Keggin-type polyoxotungstate: synthesis and X-ray crystal structure of**

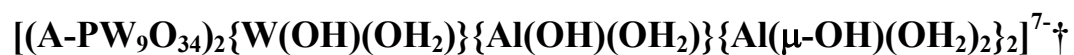

**Chika Nozaki Kato, Yurika Katayama, Masaru Nagami, Masao Kato and**

**Mikio Yamasaki**

Contents

**Table S1.** Bond lengths (Å) and angles (°) for **KNa-1**.

**Table S2.** Bond valence sum (BVS) for **KNa-1**.

**Table S1.** Bond distances (Å) and angles (°) for **KNa-1**.

| <b>KNa-1 (Å)</b> |           |             |           |
|------------------|-----------|-------------|-----------|
| W(1)-O(1)        | 1.798(13) | W(6)-O(6)   | 1.890(11) |
| W(1)-O(7)        | 1.951(9)  | W(6)-O(11)  | 1.927(10) |
| W(1)-O(12)       | 1.933(9)  | W(6)-O(12)  | 1.888(10) |
| W(1)-O(13)       | 1.740(9)  | W(6)-O(18)  | 1.737(11) |
| W(1)-O(19)       | 2.029(14) | W(6)-O(24)  | 1.999(12) |
| W(1)-O(31)       | 2.366(9)  | W(6)-O(33)  | 2.388(10) |
| W(2)-O(2)        | 1.799(13) | W(7)-O(19)  | 1.869(13) |
| W(2)-O(7)        | 1.947(10) | W(7)-O(24)  | 1.898(10) |
| W(2)-O(8)        | 1.952(9)  | W(7)-O(25)  | 1.977(11) |
| W(2)-O(14)       | 1.721(8)  | W(7)-O(27)  | 1.960(12) |
| W(2)-O(20)       | 2.038(13) | W(7)-O(28)  | 1.732(10) |
| W(2)-O(31)       | 2.396(9)  | W(7)-O(34)  | 2.394(9)  |
| W(3)-O(3)        | 1.945(11) | W(8)-O(20)  | 1.844(13) |
| W(3)-O(8)        | 1.893(10) | W(8)-O(21)  | 1.921(9)  |
| W(3)-O(9)        | 1.907(10) | W(8)-O(25)  | 1.939(10) |
| W(3)-O(15)       | 1.732(9)  | W(8)-O(26)  | 1.962(11) |
| W(3)-O(21)       | 1.954(11) | W(8)-O(29)  | 1.718(11) |
| W(3)-O(32)       | 2.347(9)  | W(8)-O(34)  | 2.388(10) |
| W(4)-O(4)        | 1.859(13) | W(9)-O(22)  | 1.902(10) |
| W(4)-O(9)        | 1.949(9)  | W(9)-O(23)  | 1.916(11) |
| W(4)-O(10)       | 1.921(10) | W(9)-O(26)  | 1.927(9)  |
| W(4)-O(16)       | 1.736(10) | W(9)-O(27)  | 1.952(9)  |
| W(4)-O(22)       | 1.970(12) | W(9)-O(30)  | 1.743(16) |
| W(4)-O(32)       | 2.405(9)  | W(9)-O(34)  | 2.399(12) |
| W(5)-O(5)        | 1.867(13) | W(10)-O(35) | 1.792(12) |
| W(5)-O(10)       | 1.918(9)  | W(10)-O(41) | 1.924(10) |
| W(5)-O(11)       | 1.910(10) | W(10)-O(46) | 1.921(10) |
| W(5)-O(17)       | 1.741(11) | W(10)-O(47) | 1.769(12) |
| W(5)-O(23)       | 1.949(12) | W(10)-O(53) | 2.028(9)  |
| W(5)-O(33)       | 2.438(9)  | W(10)-O(65) | 2.390(10) |

**Table S1-continued**

| <b>KNa-1 (Å)</b> |           |             |           |
|------------------|-----------|-------------|-----------|
| W(11)-O(36)      | 1.815(11) | W(16)-O(53) | 1.867(8)  |
| W(11)-O(41)      | 1.945(11) | W(16)-O(58) | 1.916(12) |
| W(11)-O(42)      | 1.947(11) | W(16)-O(59) | 1.967(10) |
| W(11)-O(48)      | 1.745(12) | W(16)-O(61) | 1.958(9)  |
| W(11)-O(54)      | 2.045(10) | W(16)-O(62) | 1.741(14) |
| W(11)-O(65)      | 2.371(9)  | W(16)-O(68) | 2.408(12) |
| W(12)-O(37)      | 1.922(12) | W(17)-O(54) | 1.859(8)  |
| W(12)-O(42)      | 1.891(9)  | W(17)-O(55) | 1.905(12) |
| W(12)-O(43)      | 1.940(9)  | W(17)-O(59) | 1.949(12) |
| W(12)-O(49)      | 1.755(10) | W(17)-O(60) | 1.950(8)  |
| W(12)-O(55)      | 1.960(12) | W(17)-O(63) | 1.702(12) |
| W(12)-O(66)      | 2.352(8)  | W(17)-O(68) | 2.403(11) |
| W(13)-O(38)      | 1.849(11) | W(18)-O(56) | 1.889(12) |
| W(13)-O(43)      | 1.926(10) | W(18)-O(57) | 1.904(11) |
| W(13)-O(44)      | 1.922(10) | W(18)-O(60) | 1.955(11) |
| W(13)-O(50)      | 1.736(9)  | W(18)-O(61) | 1.921(13) |
| W(13)-O(56)      | 1.983(13) | W(18)-O(64) | 1.709(8)  |
| W(13)-O(66)      | 2.413(8)  | W(18)-O(68) | 2.391(8)  |
| W(14)-O(39)      | 1.840(11) | P(1)-O(31)  | 1.555(11) |
| W(14)-O(44)      | 1.895(11) | P(1)-O(32)  | 1.532(9)  |
| W(14)-O(45)      | 1.961(11) | P(1)-O(33)  | 1.534(10) |
| W(14)-O(51)      | 1.739(9)  | P(1)-O(34)  | 1.594(13) |
| W(14)-O(57)      | 1.985(12) | P(2)-O(65)  | 1.538(8)  |
| W(14)-O(67)      | 2.412(9)  | P(2)-O(66)  | 1.539(10) |
| W(15)-O(40)      | 1.904(13) | P(2)-O(67)  | 1.553(10) |
| W(15)-O(45)      | 1.924(9)  | P(2)-O(68)  | 1.577(12) |
| W(15)-O(46)      | 1.906(9)  |             |           |
| W(15)-O(52)      | 1.734(11) |             |           |
| W(15)-O(58)      | 1.983(12) |             |           |
| W(15)-O(67)      | 2.357(9)  |             |           |

**Table S1-continued**

| <b>KNa-1 (°)</b> |          |                  |          |
|------------------|----------|------------------|----------|
| O(1)-W(1)-O(7)   | 93.6(4)  | O(3)-W(3)-O(8)   | 90.6(4)  |
| O(1)-W(1)-O(12)  | 92.2(5)  | O(3)-W(3)-O(9)   | 89.1(4)  |
| O(1)-W(1)-O(13)  | 100.8(5) | O(3)-W(3)-O(15)  | 100.4(4) |
| O(1)-W(1)-O(19)  | 166.2(4) | O(3)-W(3)-O(21)  | 163.2(4) |
| O(1)-W(1)-O(31)  | 85.7(4)  | O(3)-W(3)-O(32)  | 80.4(4)  |
| O(7)-W(1)-O(12)  | 156.0(4) | O(8)-W(3)-O(9)   | 158.2(4) |
| O(7)-W(1)-O(13)  | 100.0(4) | O(8)-W(3)-O(15)  | 103.4(4) |
| O(7)-W(1)-O(19)  | 86.5(4)  | O(8)-W(3)-O(21)  | 87.1(4)  |
| O(7)-W(1)-O(31)  | 73.8(3)  | O(8)-W(3)-O(32)  | 83.2(3)  |
| O(12)-W(1)-O(13) | 101.7(4) | O(9)-W(3)-O(15)  | 98.1(4)  |
| O(12)-W(1)-O(19) | 82.4(4)  | O(9)-W(3)-O(21)  | 87.0(4)  |
| O(12)-W(1)-O(31) | 83.5(3)  | O(9)-W(3)-O(32)  | 75.2(4)  |
| O(13)-W(1)-O(19) | 92.7(5)  | O(15)-W(3)-O(21) | 96.3(5)  |
| O(13)-W(1)-O(31) | 171.4(4) | O(15)-W(3)-O(32) | 173.3(4) |
| O(19)-W(1)-O(31) | 81.0(4)  | O(21)-W(3)-O(32) | 82.8(4)  |
| O(2)-W(2)-O(7)   | 93.4(5)  | O(4)-W(4)-O(9)   | 88.6(5)  |
| O(2)-W(2)-O(8)   | 91.3(4)  | O(4)-W(4)-O(10)  | 93.0(5)  |
| O(2)-W(2)-O(14)  | 101.4(5) | O(4)-W(4)-O(16)  | 100.9(5) |
| O(2)-W(2)-O(20)  | 166.7(3) | O(4)-W(4)-O(22)  | 160.7(4) |
| O(2)-W(2)-O(31)  | 87.2(4)  | O(4)-W(4)-O(32)  | 79.3(4)  |
| O(7)-W(2)-O(8)   | 154.1(3) | O(9)-W(4)-O(10)  | 157.6(3) |
| O(7)-W(2)-O(14)  | 99.7(4)  | O(9)-W(4)-O(16)  | 101.9(4) |
| O(7)-W(2)-O(20)  | 86.6(4)  | O(9)-W(4)-O(22)  | 84.7(4)  |
| O(7)-W(2)-O(31)  | 73.1(3)  | O(9)-W(4)-O(32)  | 73.1(4)  |
| O(8)-W(2)-O(14)  | 104.2(4) | O(10)-W(4)-O(16) | 99.7(4)  |
| O(8)-W(2)-O(20)  | 83.1(4)  | O(10)-W(4)-O(22) | 86.5(4)  |
| O(8)-W(2)-O(31)  | 81.7(3)  | O(10)-W(4)-O(32) | 85.2(3)  |
| O(14)-W(2)-O(20) | 91.6(5)  | O(16)-W(4)-O(22) | 98.2(5)  |
| O(14)-W(2)-O(31) | 169.2(4) | O(16)-W(4)-O(32) | 175.1(4) |
| O(20)-W(2)-O(31) | 80.1(4)  | O(22)-W(4)-O(32) | 81.5(4)  |

**Table S1-continued**

| <b>KNa-1 (°)</b> |          |                  |          |
|------------------|----------|------------------|----------|
| O(5)-W(5)-O(10)  | 90.9(5)  | O(19)-W(7)-O(24) | 87.3(5)  |
| O(5)-W(5)-O(11)  | 88.3(5)  | O(19)-W(7)-O(25) | 89.0(5)  |
| O(5)-W(5)-O(17)  | 101.2(5) | O(19)-W(7)-O(27) | 156.8(4) |
| O(5)-W(5)-O(23)  | 161.5(4) | O(19)-W(7)-O(28) | 102.8(5) |
| O(5)-W(5)-O(33)  | 80.6(4)  | O(19)-W(7)-O(34) | 84.4(4)  |
| O(10)-W(5)-O(11) | 155.6(4) | O(24)-W(7)-O(25) | 157.7(4) |
| O(10)-W(5)-O(17) | 101.5(4) | O(24)-W(7)-O(27) | 90.4(4)  |
| O(10)-W(5)-O(23) | 85.8(4)  | O(24)-W(7)-O(28) | 102.9(4) |
| O(10)-W(5)-O(33) | 82.5(3)  | O(24)-W(7)-O(34) | 85.9(3)  |
| O(11)-W(5)-O(17) | 102.7(4) | O(25)-W(7)-O(27) | 84.5(4)  |
| O(11)-W(5)-O(23) | 87.3(5)  | O(25)-W(7)-O(28) | 99.3(4)  |
| O(11)-W(5)-O(33) | 73.3(3)  | O(25)-W(7)-O(34) | 71.9(3)  |
| O(17)-W(5)-O(23) | 97.4(5)  | O(27)-W(7)-O(28) | 100.2(5) |
| O(17)-W(5)-O(33) | 175.6(4) | O(27)-W(7)-O(34) | 72.5(4)  |
| O(23)-W(5)-O(33) | 80.9(4)  | O(28)-W(7)-O(34) | 168.7(5) |
| O(6)-W(6)-O(11)  | 88.9(5)  | O(20)-W(8)-O(21) | 86.5(4)  |
| O(6)-W(6)-O(12)  | 95.7(4)  | O(20)-W(8)-O(25) | 90.5(5)  |
| O(6)-W(6)-O(18)  | 101.6(5) | O(20)-W(8)-O(26) | 156.4(4) |
| O(6)-W(6)-O(24)  | 161.6(4) | O(20)-W(8)-O(29) | 103.4(5) |
| O(6)-W(6)-O(33)  | 80.3(4)  | O(20)-W(8)-O(34) | 84.4(4)  |
| O(11)-W(6)-O(12) | 155.9(4) | O(21)-W(8)-O(25) | 156.3(4) |
| O(11)-W(6)-O(18) | 100.4(5) | O(21)-W(8)-O(26) | 86.8(4)  |
| O(11)-W(6)-O(24) | 84.0(4)  | O(21)-W(8)-O(29) | 103.0(4) |
| O(11)-W(6)-O(33) | 74.3(4)  | O(21)-W(8)-O(34) | 83.6(3)  |
| O(12)-W(6)-O(18) | 101.8(4) | O(25)-W(8)-O(26) | 86.5(4)  |
| O(12)-W(6)-O(24) | 84.4(5)  | O(25)-W(8)-O(29) | 100.6(4) |
| O(12)-W(6)-O(33) | 83.1(3)  | O(25)-W(8)-O(34) | 72.6(3)  |
| O(18)-W(6)-O(24) | 96.4(5)  | O(26)-W(8)-O(29) | 100.1(5) |
| O(18)-W(6)-O(33) | 174.4(5) | O(26)-W(8)-O(34) | 72.4(4)  |
| O(24)-W(6)-O(33) | 81.4(4)  | O(29)-W(8)-O(34) | 169.9(5) |

**Table S1-continued**

| <b>KNa-1 (°)</b>  |          |                   |          |
|-------------------|----------|-------------------|----------|
| O(22)-W(9)-O(23)  | 86.8(4)  | O(36)-W(11)-O(41) | 95.2(4)  |
| O(22)-W(9)-O(26)  | 89.6(4)  | O(36)-W(11)-O(42) | 92.4(5)  |
| O(22)-W(9)-O(27)  | 157.2(5) | O(36)-W(11)-O(48) | 100.8(5) |
| O(22)-W(9)-O(30)  | 101.3(5) | O(36)-W(11)-O(54) | 165.8(4) |
| O(22)-W(9)-O(34)  | 84.8(4)  | O(36)-W(11)-O(65) | 86.6(4)  |
| O(23)-W(9)-O(26)  | 157.1(5) | O(41)-W(11)-O(42) | 155.3(3) |
| O(23)-W(9)-O(27)  | 88.3(4)  | O(41)-W(11)-O(48) | 101.3(5) |
| O(23)-W(9)-O(30)  | 102.3(5) | O(41)-W(11)-O(54) | 85.1(4)  |
| O(23)-W(9)-O(34)  | 84.4(4)  | O(41)-W(11)-O(65) | 73.5(4)  |
| O(26)-W(9)-O(27)  | 86.2(4)  | O(42)-W(11)-O(48) | 100.3(5) |
| O(26)-W(9)-O(30)  | 100.6(5) | O(42)-W(11)-O(54) | 81.9(4)  |
| O(26)-W(9)-O(34)  | 72.7(4)  | O(42)-W(11)-O(65) | 83.5(3)  |
| O(27)-W(9)-O(30)  | 101.5(5) | O(48)-W(11)-O(54) | 93.0(5)  |
| O(27)-W(9)-O(34)  | 72.5(4)  | O(48)-W(11)-O(65) | 171.5(5) |
| O(30)-W(9)-O(34)  | 171.0(4) | O(54)-W(11)-O(65) | 79.9(3)  |
| O(35)-W(10)-O(41) | 94.2(4)  | O(37)-W(12)-O(42) | 92.5(4)  |
| O(35)-W(10)-O(46) | 92.5(5)  | O(37)-W(12)-O(43) | 89.2(4)  |
| O(35)-W(10)-O(47) | 100.5(5) | O(37)-W(12)-O(49) | 98.7(5)  |
| O(35)-W(10)-O(53) | 167.1(5) | O(37)-W(12)-O(55) | 162.3(4) |
| O(35)-W(10)-O(65) | 87.1(4)  | O(37)-W(12)-O(66) | 80.5(4)  |
| O(41)-W(10)-O(46) | 154.5(4) | O(42)-W(12)-O(43) | 158.0(4) |
| O(41)-W(10)-O(47) | 101.3(5) | O(42)-W(12)-O(49) | 99.8(4)  |
| O(41)-W(10)-O(53) | 84.7(4)  | O(42)-W(12)-O(55) | 86.3(4)  |
| O(41)-W(10)-O(65) | 73.5(4)  | O(42)-W(12)-O(66) | 84.2(3)  |
| O(46)-W(10)-O(47) | 101.7(4) | O(43)-W(12)-O(49) | 101.6(4) |
| O(46)-W(10)-O(53) | 83.4(4)  | O(43)-W(12)-O(55) | 85.5(4)  |
| O(46)-W(10)-O(65) | 82.3(3)  | O(43)-W(12)-O(66) | 74.4(3)  |
| O(47)-W(10)-O(53) | 92.3(4)  | O(49)-W(12)-O(55) | 98.9(5)  |
| O(47)-W(10)-O(65) | 171.1(4) | O(49)-W(12)-O(66) | 175.9(4) |
| O(53)-W(10)-O(65) | 80.3(4)  | O(55)-W(12)-O(66) | 81.8(4)  |

**Table S1-continued**

| <b>KNa-1 (°)</b>  |          |                   |          |
|-------------------|----------|-------------------|----------|
| O(38)-W(13)-O(43) | 88.2(4)  | O(40)-W(15)-O(45) | 88.8(4)  |
| O(38)-W(13)-O(44) | 92.8(4)  | O(40)-W(15)-O(46) | 94.1(4)  |
| O(38)-W(13)-O(50) | 100.9(4) | O(40)-W(15)-O(52) | 100.0(5) |
| O(38)-W(13)-O(56) | 160.7(4) | O(40)-W(15)-O(58) | 163.2(4) |
| O(38)-W(13)-O(66) | 79.7(4)  | O(40)-W(15)-O(67) | 80.7(4)  |
| O(43)-W(13)-O(44) | 156.2(4) | O(45)-W(15)-O(46) | 157.2(4) |
| O(43)-W(13)-O(50) | 101.1(4) | O(45)-W(15)-O(52) | 98.9(4)  |
| O(43)-W(13)-O(56) | 85.8(4)  | O(45)-W(15)-O(58) | 86.5(4)  |
| O(43)-W(13)-O(66) | 73.2(3)  | O(45)-W(15)-O(67) | 75.4(3)  |
| O(44)-W(13)-O(50) | 102.1(4) | O(46)-W(15)-O(52) | 102.8(4) |
| O(44)-W(13)-O(56) | 85.5(4)  | O(46)-W(15)-O(58) | 84.3(4)  |
| O(44)-W(13)-O(66) | 83.5(3)  | O(46)-W(15)-O(67) | 82.8(3)  |
| O(50)-W(13)-O(56) | 98.3(4)  | O(52)-W(15)-O(58) | 96.7(5)  |
| O(50)-W(13)-O(66) | 174.3(3) | O(52)-W(15)-O(67) | 174.3(3) |
| O(56)-W(13)-O(66) | 81.0(3)  | O(58)-W(15)-O(67) | 82.5(4)  |
| O(39)-W(14)-O(44) | 94.3(4)  | O(53)-W(16)-O(58) | 87.8(4)  |
| O(39)-W(14)-O(45) | 88.0(4)  | O(53)-W(16)-O(59) | 89.9(4)  |
| O(39)-W(14)-O(51) | 101.5(5) | O(53)-W(16)-O(61) | 155.0(5) |
| O(39)-W(14)-O(57) | 160.7(4) | O(53)-W(16)-O(62) | 104.3(4) |
| O(39)-W(14)-O(67) | 80.7(4)  | O(53)-W(16)-O(68) | 83.9(4)  |
| O(44)-W(14)-O(45) | 156.0(4) | O(58)-W(16)-O(59) | 156.8(5) |
| O(44)-W(14)-O(51) | 102.9(4) | O(58)-W(16)-O(61) | 87.5(4)  |
| O(44)-W(14)-O(57) | 85.0(4)  | O(58)-W(16)-O(62) | 102.5(5) |
| O(44)-W(14)-O(67) | 83.4(3)  | O(58)-W(16)-O(68) | 84.3(4)  |
| O(45)-W(14)-O(51) | 100.0(4) | O(59)-W(16)-O(61) | 84.9(4)  |
| O(45)-W(14)-O(57) | 85.0(4)  | O(59)-W(16)-O(62) | 100.4(5) |
| O(45)-W(14)-O(67) | 73.4(3)  | O(59)-W(16)-O(68) | 72.4(4)  |
| O(51)-W(14)-O(57) | 97.5(4)  | O(61)-W(16)-O(62) | 100.7(4) |
| O(51)-W(14)-O(67) | 173.1(5) | O(61)-W(16)-O(68) | 71.2(4)  |
| O(57)-W(14)-O(67) | 80.1(3)  | O(62)-W(16)-O(68) | 169.4(4) |

**Table S1-continued**

| <b>KNa-1 (°)</b>  |          |                  |          |
|-------------------|----------|------------------|----------|
| O(54)-W(17)-O(55) | 87.4(4)  | O(31)-P(1)-O(32) | 110.9(5) |
| O(54)-W(17)-O(59) | 91.0(4)  | O(31)-P(1)-O(33) | 112.0(6) |
| O(54)-W(17)-O(60) | 156.0(5) | O(31)-P(1)-O(34) | 108.7(5) |
| O(54)-W(17)-O(63) | 103.9(4) | O(32)-P(1)-O(33) | 109.9(5) |
| O(54)-W(17)-O(68) | 84.1(3)  | O(32)-P(1)-O(34) | 107.4(6) |
| O(55)-W(17)-O(59) | 157.3(4) | O(33)-P(1)-O(34) | 107.8(6) |
| O(55)-W(17)-O(60) | 86.8(4)  | O(65)-P(2)-O(66) | 111.2(5) |
| O(55)-W(17)-O(63) | 102.4(5) | O(65)-P(2)-O(67) | 111.5(5) |
| O(55)-W(17)-O(68) | 84.4(4)  | O(65)-P(2)-O(68) | 108.7(6) |
| O(59)-W(17)-O(60) | 85.5(4)  | O(66)-P(2)-O(67) | 110.8(6) |
| O(59)-W(17)-O(63) | 100.0(5) | O(66)-P(2)-O(68) | 106.8(5) |
| O(59)-W(17)-O(68) | 72.9(4)  | O(67)-P(2)-O(68) | 107.7(5) |
| O(60)-W(17)-O(63) | 100.1(4) | W(1)-O(1)-Al(1)  | 163.2(6) |
| O(60)-W(17)-O(68) | 72.1(3)  | W(2)-O(2)-Al(2)  | 161.4(6) |
| O(63)-W(17)-O(68) | 169.6(4) | W(3)-O(3)-W(20)  | 142.8(5) |
| O(56)-W(18)-O(57) | 86.5(5)  | W(3)-O(3)-Al(4)  | 142.8(5) |
| O(56)-W(18)-O(60) | 88.2(5)  | W(4)-O(4)-W(20)  | 145.2(4) |
| O(56)-W(18)-O(61) | 157.5(3) | W(4)-O(4)-Al(4)  | 145.2(4) |
| O(56)-W(18)-O(64) | 101.0(5) | W(5)-O(5)-W(19)  | 142.6(4) |
| O(56)-W(18)-O(68) | 85.4(3)  | W(5)-O(5)-Al(3)  | 142.6(4) |
| O(57)-W(18)-O(60) | 156.5(3) | W(6)-O(6)-W(19)  | 142.4(6) |
| O(57)-W(18)-O(61) | 89.0(5)  | W(6)-O(6)-Al(3)  | 142.4(6) |
| O(57)-W(18)-O(64) | 102.5(4) | W(1)-O(7)-W(2)   | 121.0(4) |
| O(57)-W(18)-O(68) | 84.4(3)  | W(2)-O(8)-W(3)   | 153.4(6) |
| O(60)-W(18)-O(61) | 87.2(5)  | W(3)-O(9)-W(4)   | 121.0(6) |
| O(60)-W(18)-O(64) | 101.0(4) | W(4)-O(10)-W(5)  | 151.7(5) |
| O(60)-W(18)-O(68) | 72.3(3)  | W(5)-O(11)-W(6)  | 122.7(5) |
| O(61)-W(18)-O(64) | 101.5(5) | W(1)-O(12)-W(6)  | 156.4(7) |
| O(61)-W(18)-O(68) | 72.2(3)  | W(1)-O(19)-W(7)  | 151.3(5) |
| O(64)-W(18)-O(68) | 170.7(5) | W(2)-O(20)-W(8)  | 153.6(4) |



**Table S1-continued**

| <b>KNa-1 (°)</b>  |          |                   |          |
|-------------------|----------|-------------------|----------|
| W(3)-O(21)-W(8)   | 149.0(7) | W(15)-O(40)-Al(3) | 144.6(5) |
| W(4)-O(22)-W(9)   | 149.7(7) | W(10)-O(41)-W(11) | 121.0(6) |
| W(5)-O(23)-W(9)   | 151.6(6) | W(11)-O(42)-W(12) | 154.2(5) |
| W(6)-O(24)-W(7)   | 148.9(6) | W(12)-O(43)-W(13) | 121.2(4) |
| W(7)-O(25)-W(8)   | 123.3(5) | W(13)-O(44)-W(14) | 153.7(7) |
| W(8)-O(26)-W(9)   | 123.4(6) | W(14)-O(45)-W(15) | 120.2(5) |
| W(7)-O(27)-W(9)   | 123.2(6) | W(10)-O(46)-W(15) | 156.5(5) |
| W(1)-O(31)-W(2)   | 90.8(2)  | W(10)-O(53)-W(16) | 151.0(7) |
| W(1)-O(31)-P(1)   | 127.7(5) | W(11)-O(54)-W(17) | 152.5(7) |
| W(2)-O(31)-P(1)   | 128.2(6) | W(12)-O(55)-W(17) | 148.6(4) |
| W(3)-O(32)-W(4)   | 89.8(3)  | W(13)-O(56)-W(18) | 150.2(5) |
| W(3)-O(32)-P(1)   | 128.3(4) | W(14)-O(57)-W(18) | 151.1(5) |
| W(4)-O(32)-P(1)   | 128.1(6) | W(15)-O(58)-W(16) | 149.2(5) |
| W(5)-O(33)-W(6)   | 88.5(3)  | W(16)-O(59)-W(17) | 123.2(7) |
| W(5)-O(33)-P(1)   | 129.4(6) | W(17)-O(60)-W(18) | 123.7(5) |
| W(6)-O(33)-P(1)   | 128.4(4) | W(16)-O(61)-W(18) | 125.0(5) |
| W(7)-O(34)-W(8)   | 92.2(3)  | W(10)-O(65)-W(11) | 90.1(3)  |
| W(7)-O(34)-W(9)   | 91.8(4)  | W(10)-O(65)-P(2)  | 128.1(5) |
| W(7)-O(34)-P(1)   | 122.9(6) | W(11)-O(65)-P(2)  | 129.3(5) |
| W(8)-O(34)-W(9)   | 91.4(4)  | W(12)-O(66)-W(13) | 89.9(2)  |
| W(8)-O(34)-P(1)   | 124.4(5) | W(12)-O(66)-P(2)  | 128.9(6) |
| W(9)-O(34)-P(1)   | 124.7(4) | W(13)-O(66)-P(2)  | 128.8(4) |
| W(10)-O(35)-Al(1) | 162.5(7) | W(14)-O(67)-W(15) | 89.8(3)  |
| W(11)-O(36)-Al(2) | 166.6(6) | W(14)-O(67)-P(2)  | 128.7(4) |
| W(12)-O(37)-W(20) | 141.8(5) | W(15)-O(67)-P(2)  | 128.2(7) |
| W(12)-O(37)-Al(4) | 141.8(5) | W(16)-O(68)-W(17) | 91.4(4)  |
| W(13)-O(38)-W(20) | 144.3(6) | W(16)-O(68)-W(18) | 91.6(3)  |
| W(13)-O(38)-Al(4) | 144.3(6) | W(16)-O(68)-P(2)  | 124.0(5) |
| W(14)-O(39)-W(19) | 145.6(7) | W(17)-O(68)-W(18) | 91.8(3)  |
| W(14)-O(39)-Al(3) | 145.6(7) | W(17)-O(68)-P(2)  | 123.6(5) |
| W(15)-O(40)-W(19) | 144.6(5) | W(18)-O(68)-P(2)  | 124.7(6) |

**Table S2.** Bond valence sum (BVS) calculation for **KNa-1**.

|       | <b>BVS</b> |       | <b>BVS</b> |
|-------|------------|-------|------------|
| O(1)  | 1.884      | O(36) | 1.851      |
| O(2)  | 1.878      | O(41) | 1.908      |
| O(7)  | 1.832      | O(42) | 1.992      |
| O(8)  | 1.975      | O(43) | 1.913      |
| O(9)  | 1.942      | O(44) | 2.047      |
| O(10) | 1.984      | O(45) | 1.867      |
| O(11) | 1.992      | O(46) | 2.017      |
| O(12) | 2.036      | O(47) | 1.491      |
| O(13) | 1.610      | O(48) | 1.591      |
| O(14) | 1.695      | O(49) | 1.549      |
| O(15) | 1.645      | O(50) | 1.627      |
| O(16) | 1.631      | O(51) | 1.614      |
| O(17) | 1.609      | O(52) | 1.639      |
| O(18) | 1.626      | O(53) | 1.881      |
| O(19) | 1.877      | O(54) | 1.874      |
| O(20) | 1.939      | O(55) | 1.923      |
| O(21) | 1.892      | O(56) | 1.914      |
| O(22) | 1.907      | O(57) | 1.867      |
| O(23) | 1.919      | O(58) | 1.838      |
| O(24) | 1.853      | O(59) | 1.790      |
| O(25) | 1.792      | O(60) | 1.815      |
| O(26) | 1.856      | O(61) | 1.882      |
| O(27) | 1.798      | O(62) | 1.608      |
| O(28) | 1.648      | O(63) | 1.787      |
| O(29) | 1.712      | O(64) | 1.751      |
| O(30) | 1.600      | O(65) | 1.805      |
| O(31) | 1.751      | O(66) | 1.803      |
| O(32) | 1.834      | O(67) | 1.755      |
| O(33) | 1.775      | O(68) | 1.925      |
| O(34) | 1.891      | O(69) | 0.887      |
| O(35) | 1.901      | O(70) | 1.010      |

**Table S2-continued.**

|       | <b>BVS</b> |       | <b>BVS</b> |
|-------|------------|-------|------------|
| O(71) | 0.404      | W(10) | 5.879      |
| O(72) | 0.457      | W(11) | 5.756      |
| O(73) | 0.438      | W(12) | 5.740      |
| O(74) | 0.434      | W(13) | 5.887      |
| W(1)  | 5.889      | W(14) | 5.888      |
| W(2)  | 5.894      | W(15) | 5.821      |
| W(3)  | 5.883      | W(16) | 5.783      |
| W(4)  | 5.837      | W(17) | 6.086      |
| W(5)  | 5.928      | W(18) | 6.032      |
| W(6)  | 5.836      | P(1)  | 4.752      |
| W(7)  | 5.853      | P(2)  | 4.772      |
| W(8)  | 6.024      | Al(1) | 2.798      |
| W(9)  | 5.794      | Al(2) | 2.874      |
